# Supplementary material for: An Environmentally Sensitive Silk Fibroin/Chitosan Hydrogel and Its Drug Release Behaviors
Source: Polymers (Basel). 2019 Dec 1;11(12):1980. doi: 10.3390/polym11121980 (PMC6960489; doi:10.3390/polym11121980)
Supplement: Supplementary file 1 [file polymers-11-01980-s001.pdf]

**Supplement Information for**  
**An environmentally sensitive silk fibroin/chitosan hydrogel**  
**and its drug release behaviors**

**Zhangpeng Xu<sup>1</sup> · Erni Tang<sup>2</sup> · Huijing Zhao<sup>1\*</sup>**

1 National Engineering Laboratory for Modern Silk, College of Textile and Clothing Engineering, Soochow University, No. 199 Ren'ai Road, Industrial Park, Suzhou 215123, China

2 China Leather and Footwear Industry Research Institute (Jinjiang) Co.,Ltd, No. 150 Wenhua Road, Hongshan Comprehensive District, Jinjiang 362200, China

Correspondence to [zhhj@suda.edu.cn](mailto:zhhj@suda.edu.cn)

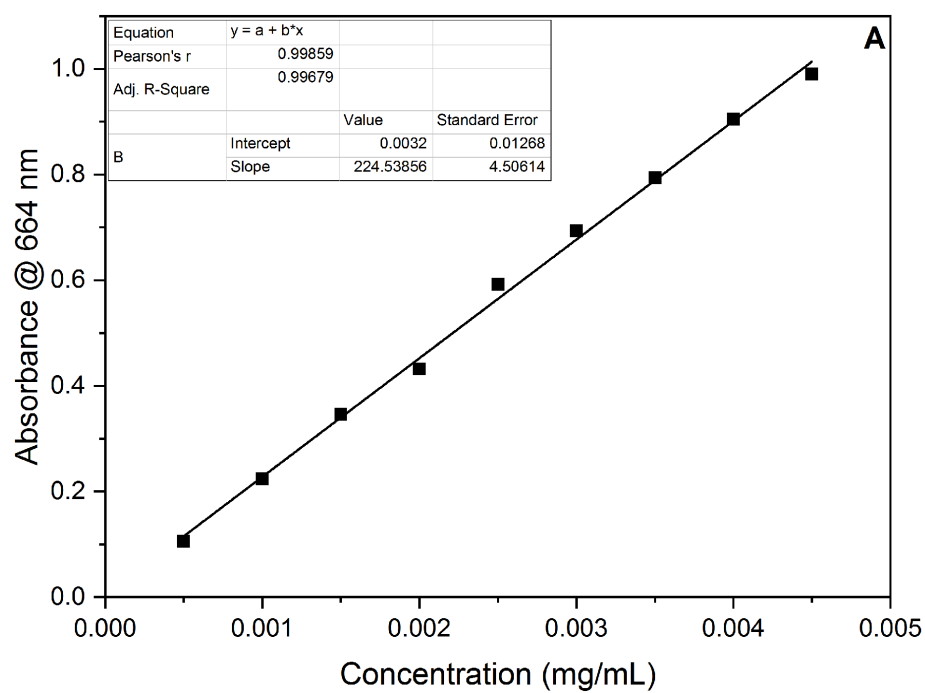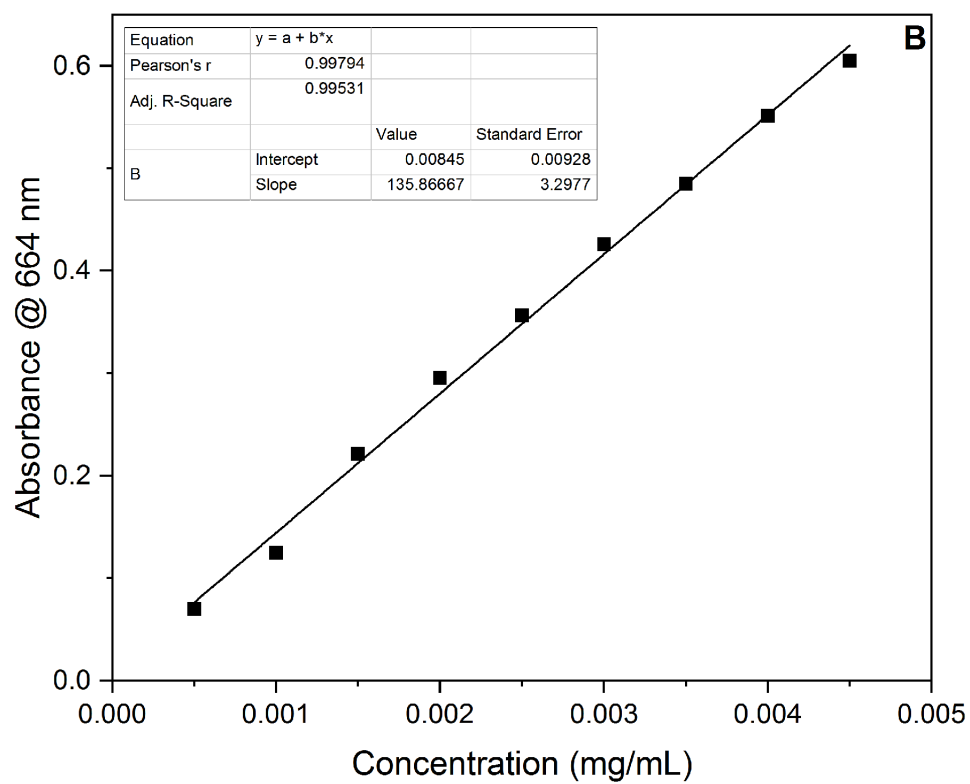

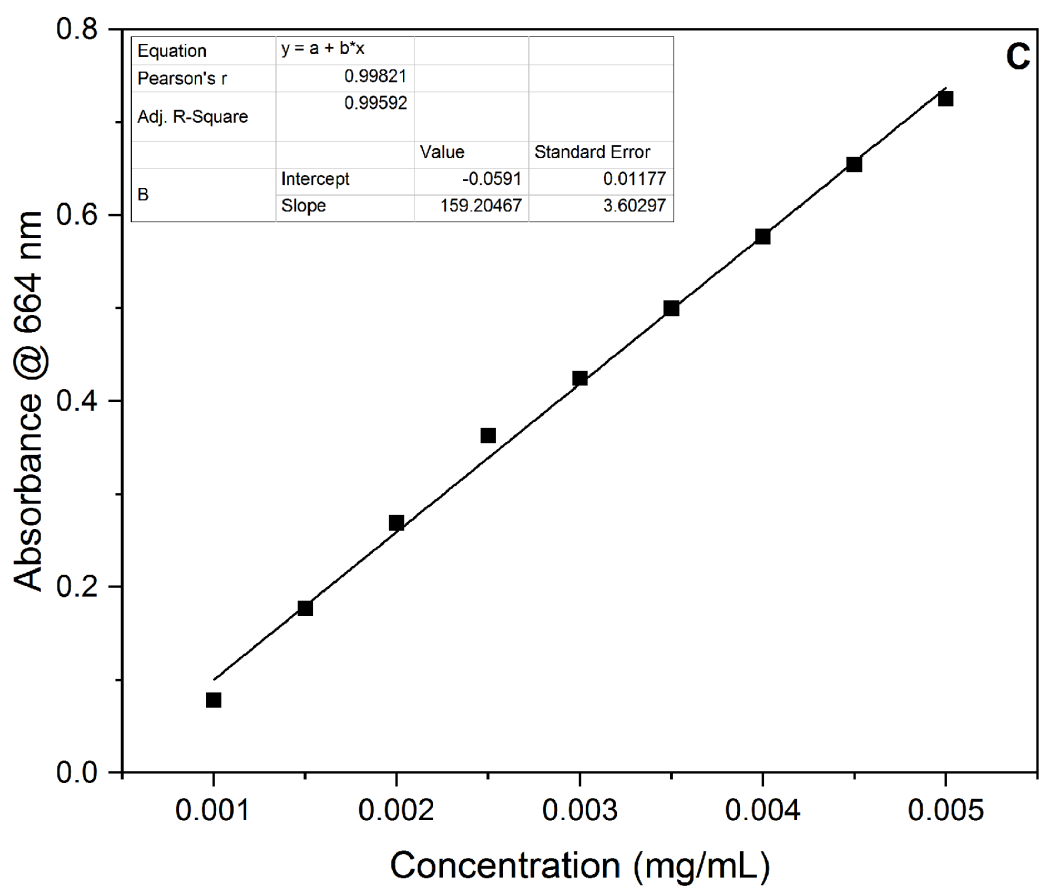

Fig. SII. (A) Standard curve of MB in deionized water, (B) Standard curve of MB in PBS (pH=7.4, 37°C), (C) Standard curve of MB in PBS (pH=2.2, 37°C).

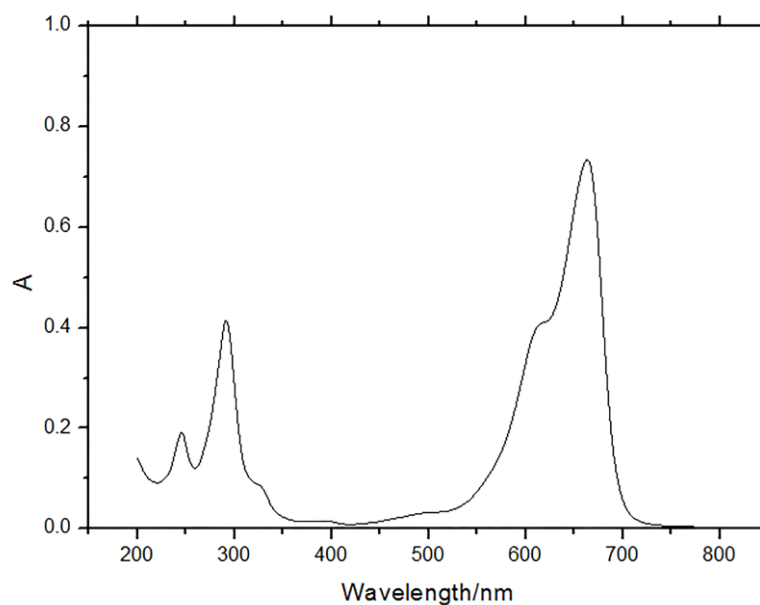

Fig. SI2: UV-visible spectroscopy of MB

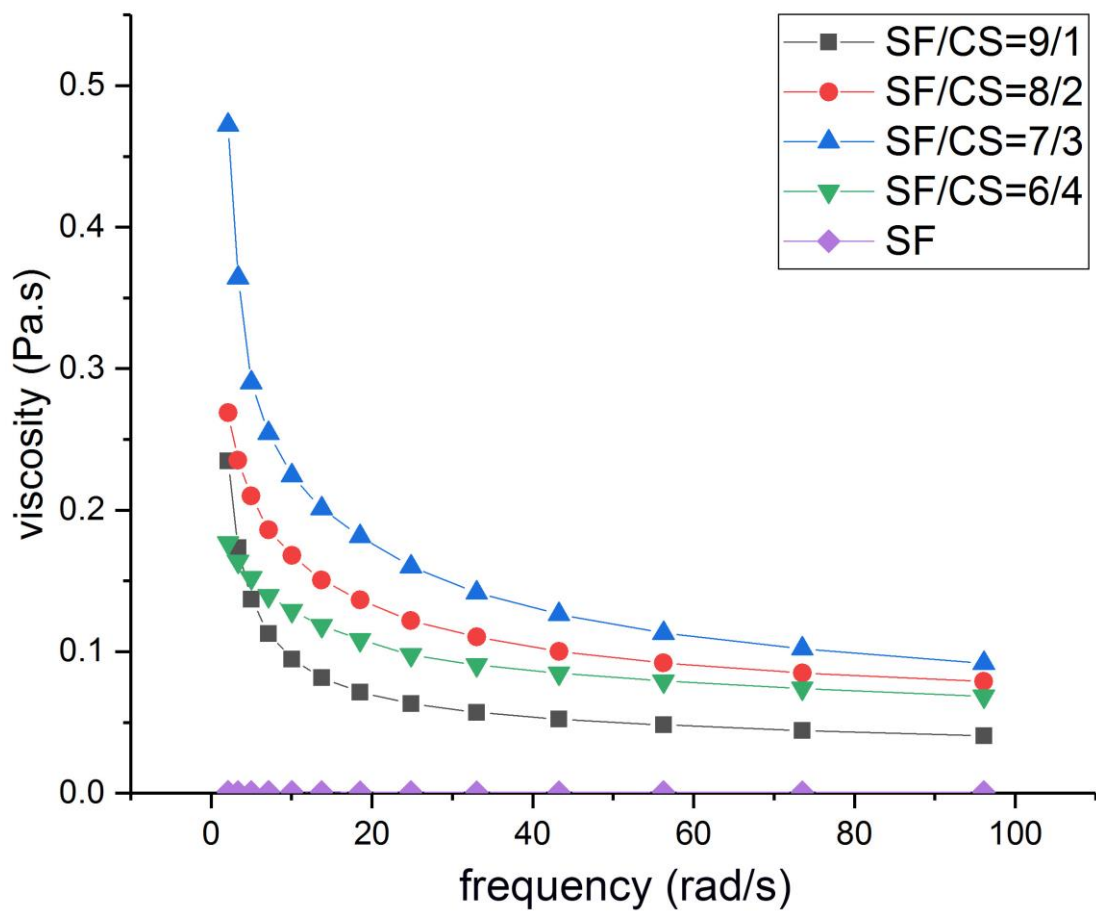

Fig. SI3: The viscosity of mixed solutions.

The dynamic viscosity of mixed solutions was determined by AR-2000 rheometer (TA Instrument, New Castle, USA), fitted with parallel plate (diameter of 20 mm) kept at a gap distance of 1 mm. The shear velocity ranged from 0~100 rad/s.

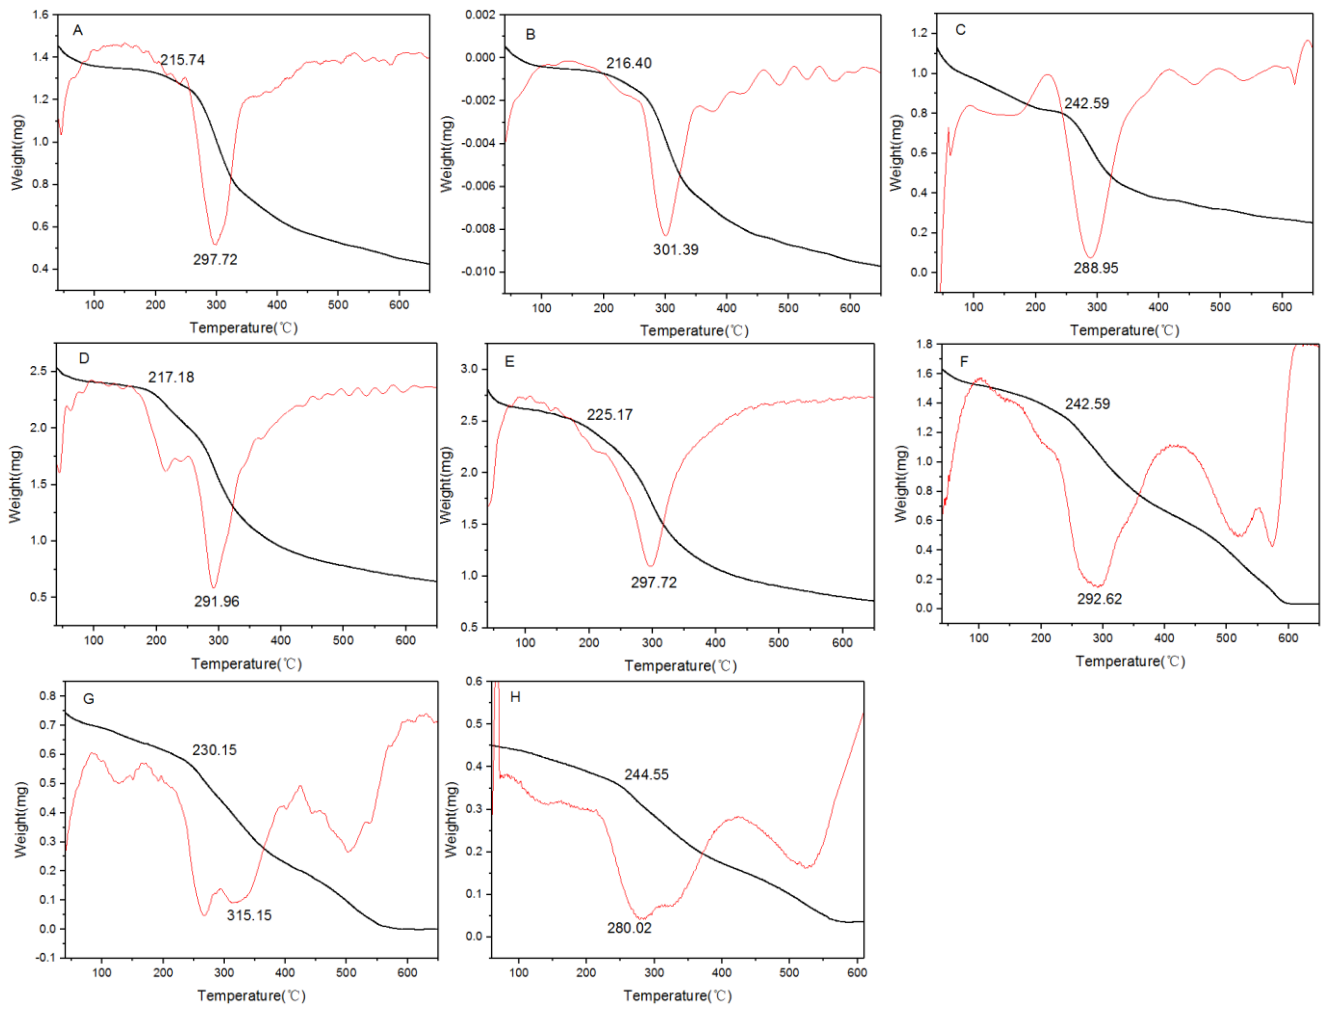

Fig. SI4: The thermograms of hydrogels. (A) SF; (B) NSF; (C) CS; (D) SF/CS=10/0; (E) SF/CS=9/1; (F) SF/CS=8/2; (G) SF/CS= 7/3; (H) SF/CS=6/4
